# Supplementary material for: Physical stability vs. chemical lability in microporous metal coordination polymers: a comparison of [Cu(OH)(INA)]n and [Cu(INA)2]n: INA = 1,4-(NC5H4CO2)Electronic supplementary information (ESI) available: 1. Structure determination summaries for compounds 1–3. 2. Powder X-ray diffraction patterns: (a) for 1 and (b) for 2 after prolonged heating at different temperatures, establishing framework stabilities and (c) showing transformation of polymer 2 to the molecular compound 3, after 12 h in H2O. Fig. S1: copper coordination environments in compounds 1–3. See http://www.rsc.org/suppdata/cc/b2/b201501n/
Source: Royal Society of Chemistry journal article supplement (doi:10.1039/b201501n), 2002-07-02
Supplement: b201501n.doc [file b201501n.doc]

Supplementary Material (ESI) for Chemical Communications

This journal is © The Royal Society of Chemistry 2002

Table 1. Crystal data and structure refinement for [Cu(INA)(OH)]H2O.

Identification code candy2

Empirical formula C6 H7 Cu N O4

Formula weight 220.67

Temperature 293(2) K

Wavelength 0.71070 A

Crystal system Monoclinic

Space group P2(1)/n

Unit cell dimensions a = 3.53400(10) A alpha = 90 deg.

b = 15.7680(5) A beta = 96.8850(13) deg.

c = 13.0052(4) A gamma = 90 deg.

Volume, Z 719.48(4) A^3, 4

Density (calculated) 2.037 Mg/m^3

Absorption coefficient 3.004 mm^-1

F(000) 444

Crystal size 0.3 x 0.2 x 0.08 mm

Theta range for data collection 3.03 to 30.00 deg.

Limiting indices -4<=h<=4, -19<=k<=22, -18<=l<=18

Reflections collected 3585

Independent reflections 2078 [R(int) = 0.026]

Refinement method Full-matrix least-squares on F^2

Data / restraints / parameters 2038 / 0 / 109

Goodness-of-fit on F^2 1.124

Final R indices [I>2sigma(I)] R1 = 0.0364, wR2 = 0.0821

R indices (all data) R1 = 0.0512, wR2 = 0.1216

Largest diff. peak and hole 0.970 and -0.687 e.A^-3

Table 2. Atomic coordinates ( x 10^4) and equivalent isotropic

displacement parameters (A^2 x 10^3) for [Cu(INA)(OH)]H2O.

________________________________________________________________

x y z U(eq)

________________________________________________________________

Cu(1) 2624(1) 780(1) 4949(1) 9(1)

O(1) 3131(5) -284(1) 5705(1) 9(1)

N(1) 2571(6) 1796(1) 4035(2) 10(1)

C(2) 2548(7) 1654(2) 3011(2) 13(1)

C(3) 3414(7) 2281(2) 2332(2) 12(1)

C(4) 4350(7) 3086(2) 2712(2) 12(1)

C(5) 4260(8) 3238(2) 3763(2) 14(1)

C(6) 3355(7) 2580(2) 4397(2) 13(1)

C(10) 5602(7) 3774(2) 2010(2) 11(1)

O(11) 5370(6) 3579(1) 1060(1) 13(1)

O(12) 6811(7) 4450(1) 2416(2) 21(1)

O(1W) 9245(19) 5464(2) 4130(3) 107(2)

________________________________________________________________

Table 3. Bond lengths [A] and angles [deg] for [Cu(INA)(OH)]H2O.

_____________________________________________________________

Cu(1)-O(1) 1.942(2)

Cu(1)-O(1)#1 1.973(2)

Cu(1)-N(1) 1.994(2)

Cu(1)-O(11)#2 2.004(2)

Cu(1)-O(1)#3 2.249(2)

Cu(1)-Cu(1)#1 2.9727(6)

O(1)-Cu(1)#1 1.973(2)

O(1)-Cu(1)#3 2.249(2)

N(1)-C(6) 1.340(3)

N(1)-C(2) 1.349(3)

C(2)-C(3) 1.384(4)

C(3)-C(4) 1.388(4)

C(4)-C(5) 1.391(4)

C(4)-C(10) 1.517(4)

C(5)-C(6) 1.387(4)

C(10)-O(12) 1.243(3)

C(10)-O(11) 1.267(3)

O(11)-Cu(1)#4 2.004(2)

O(1)-Cu(1)-O(1)#1 81.19(8)

O(1)-Cu(1)-N(1) 171.80(8)

O(1)#1-Cu(1)-N(1) 90.85(8)

O(1)-Cu(1)-O(11)#2 95.26(8)

O(1)#1-Cu(1)-O(11)#2 154.05(8)

N(1)-Cu(1)-O(11)#2 92.76(9)

O(1)-Cu(1)-O(1)#3 85.14(7)

O(1)#1-Cu(1)-O(1)#3 113.49(8)

N(1)-Cu(1)-O(1)#3 96.35(8)

O(11)#2-Cu(1)-O(1)#3 91.63(7)

O(1)-Cu(1)-Cu(1)#1 40.99(5)

O(1)#1-Cu(1)-Cu(1)#1 40.21(5)

N(1)-Cu(1)-Cu(1)#1 131.03(6)

O(11)#2-Cu(1)-Cu(1)#1 131.05(6)

O(1)#3-Cu(1)-Cu(1)#1 102.08(5)

Cu(1)-O(1)-Cu(1)#1 98.81(8)

Cu(1)-O(1)-Cu(1)#3 94.86(7)

Cu(1)#1-O(1)-Cu(1)#3 113.49(8)

C(6)-N(1)-C(2) 118.5(2)

C(6)-N(1)-Cu(1) 123.0(2)

C(2)-N(1)-Cu(1) 117.0(2)

N(1)-C(2)-C(3) 122.4(3)

C(2)-C(3)-C(4) 119.2(2)

C(3)-C(4)-C(5) 118.3(2)

C(3)-C(4)-C(10) 120.9(2)

C(5)-C(4)-C(10) 120.7(2)

C(6)-C(5)-C(4) 119.3(3)

N(1)-C(6)-C(5) 122.3(2)

O(12)-C(10)-O(11) 127.0(2)

O(12)-C(10)-C(4) 117.9(2)

O(11)-C(10)-C(4) 115.1(2)

C(10)-O(11)-Cu(1)#4 126.5(2)

_____________________________________________________________

Symmetry transformations used to generate equivalent atoms:

#1 -x+1,-y,-z+1 #2 x-1/2,-y+1/2,z+1/2

#3 -x,-y,-z+1 #4 x+1/2,-y+1/2,z-1/2

Table 4. Anisotropic displacement parameters (A^2 x 10^3) for

[Cu(INA)(OH)]H2O.

The anisotropic displacement factor exponent takes the form:

-2 pi^2 [ h^2 a*^2 U11 + ... + 2 h k a* b* U12 ]

_______________________________________________________________________

U11 U22 U33 U23 U13 U12

_______________________________________________________________________

Cu(1) 12(1) 7(1) 8(1) 1(1) 5(1) 1(1)

O(1) 12(1) 7(1) 7(1) 1(1) 3(1) 2(1)

N(1) 11(1) 8(1) 11(1) 4(1) 4(1) 1(1)

C(2) 16(1) 11(1) 10(1) 0(1) 2(1) 0(1)

C(3) 16(1) 13(1) 9(1) 2(1) 3(1) -1(1)

C(4) 11(1) 14(1) 9(1) 3(1) 3(1) 1(1)

C(5) 18(1) 12(1) 12(1) 1(1) 5(1) -1(1)

C(6) 18(1) 11(1) 10(1) 1(1) 4(1) -1(1)

C(10) 12(1) 11(1) 12(1) 3(1) 3(1) 0(1)

O(11) 21(1) 11(1) 9(1) 1(1) 6(1) -3(1)

O(12) 35(1) 15(1) 12(1) 1(1) 5(1) -10(1)

O(1W) 256(7) 36(2) 23(2) -5(2) -14(3) -6(3)

_______________________________________________________________________

Table 5. Hydrogen coordinates ( x 10^4) and isotropic

displacement parameters (A^2 x 10^3) for [Cu(INA)(OH)]H2O.

________________________________________________________________

x y z U(eq)

________________________________________________________________

H(1) 3502(5) -240(1) 6361(1) 10

H(2) 1928(7) 1115(2) 2753(2) 15

H(3) 3370(7) 2164(2) 1630(2) 15

H(5) 4800(8) 3776(2) 4037(2) 16

H(6) 3290(7) 2686(2) 5098(2) 15

H(1W) 9069(19) 5130(2) 4635(3) 129

H(2W) 11505(19) 5656(2) 4169(3) 129

H(3W) 7691(19) 5876(2) 4127(3) 129

H(4W) 8797(19) 5191(2) 3565(3) 129

________________________________________________________________

O1W hydrogens statistically disordered 50:50

Table 1. Crystal data and structure refinement for [Cu(INA)2]2H2O.

Identification code candy3

Empirical formula C12 H12 Cu N2 O6

Formula weight 343.78

Temperature 293(2) K

Wavelength 0.71070 A

Crystal system Monoclinic

Space group Cc

Unit cell dimensions a = 4.9410(2) A alpha = 90 deg.

b = 25.0290(10) A beta = 97.834(2) deg.

c = 10.9600(4) A gamma = 90 deg.

Volume, Z 1342.75(9) A^3, 4

Density (calculated) 1.701 Mg/m^3

Absorption coefficient 1.656 mm^-1

F(000) 700

Crystal size 0.4 x 0.2 x 0.1 mm

Theta range for data collection 3.26 to 30.04 deg.

Limiting indices -6<=h<=6, -34<=k<=34, -15<=l<=15

Reflections collected 3592

Independent reflections 1880 [R(int) = 0.036]

Refinement method Full-matrix least-squares on F^2

Data / restraints / parameters 1861 / 2 / 190

Goodness-of-fit on F^2 1.057

Final R indices [I>2sigma(I)] R1 = 0.0449, wR2 = 0.0730

R indices (all data) R1 = 0.0626, wR2 = 0.0889

Absolute structure parameter 0.09(2)

Largest diff. peak and hole 0.420 and -0.552 e.A^-3

Table 2. Atomic coordinates ( x 10^4) and equivalent isotropic

displacement parameters (A^2 x 10^3) for [Cu(INA)2]2H2O.

________________________________________________________________

x y z U(eq)

________________________________________________________________

Cu(1) 5026(1) 1132(1) 4430(1) 11(1)

N(1) 6586(11) 1741(2) 5497(5) 12(1)

C(10) 9409(13) 3167(3) 7465(6) 14(1)

O(1) 8214(9) 3293(2) 8375(4) 15(1)

O(2) 11402(7) 3415(1) 7145(4) 23(1)

C(12) 5527(14) 1890(3) 6519(6) 16(1)

C(13) 6364(13) 2353(3) 7163(7) 17(1)

C(14) 8350(13) 2672(3) 6759(6) 15(1)

C(15) 9471(11) 2519(2) 5714(4) 15(1)

C(16) 8522(10) 2056(2) 5110(4) 14(1)

N(2) 3468(9) 558(2) 3253(4) 13(1)

C(20) -55(10) -663(2) 744(5) 13(1)

O(3) -2596(8) -602(2) 369(4) 14(1)

O(4) 1449(7) -1034(1) 483(3) 14(1)

C(22) 1148(11) 645(2) 2488(5) 18(1)

C(23) -46(11) 264(2) 1680(5) 17(1)

C(24) 1179(10) -232(2) 1613(4) 12(1)

C(25) 3587(10) -323(2) 2394(5) 18(1)

C(26) 4648(11) 68(2) 3212(5) 17(1)

O(1W) -3636(10) 1190(2) -286(5) 50(1)

O(2W) 971(11) 1429(3) -1350(6) 67(2)

________________________________________________________________

Table 3. Bond lengths [A] and angles [deg] for [Cu(INA)2]2H2O.

_____________________________________________________________

Cu(1)-O(3)#1 1.967(4)

Cu(1)-O(1)#2 1.981(5)

Cu(1)-N(1) 2.009(5)

Cu(1)-N(2) 2.013(5)

Cu(1)-O(4)#3 2.252(3)

N(1)-C(16) 1.352(7)

N(1)-C(12) 1.351(8)

C(10)-O(2) 1.254(7)

C(10)-O(1) 1.267(8)

C(10)-C(14) 1.515(9)

O(1)-Cu(1)#4 1.981(5)

C(12)-C(13) 1.391(9)

C(13)-C(14) 1.384(6)

C(14)-C(15) 1.392(8)

C(15)-C(16) 1.384(6)

N(2)-C(22) 1.342(7)

N(2)-C(26) 1.360(7)

C(20)-O(4) 1.246(6)

C(20)-O(3) 1.276(6)

C(20)-C(24) 1.512(7)

O(3)-Cu(1)#5 1.967(4)

O(4)-Cu(1)#6 2.252(3)

C(22)-C(23) 1.378(7)

C(23)-C(24) 1.387(6)

C(24)-C(25) 1.387(7)

C(25)-C(26) 1.382(7)

O(3)#1-Cu(1)-O(1)#2 170.1(2)

O(3)#1-Cu(1)-N(1) 93.0(2)

O(1)#2-Cu(1)-N(1) 84.03(13)

O(3)#1-Cu(1)-N(2) 90.15(14)

O(1)#2-Cu(1)-N(2) 92.4(2)

N(1)-Cu(1)-N(2) 175.8(2)

O(3)#1-Cu(1)-O(4)#3 96.48(14)

O(1)#2-Cu(1)-O(4)#3 93.1(2)

N(1)-Cu(1)-O(4)#3 92.9(2)

N(2)-Cu(1)-O(4)#3 89.5(2)

C(16)-N(1)-C(12) 118.0(5)

C(16)-N(1)-Cu(1) 119.5(4)

C(12)-N(1)-Cu(1) 122.0(5)

O(2)-C(10)-O(1) 124.4(6)

O(2)-C(10)-C(14) 119.4(6)

O(1)-C(10)-C(14) 116.2(6)

C(10)-O(1)-Cu(1)#4 114.7(4)

N(1)-C(12)-C(13) 121.9(6)

C(14)-C(13)-C(12) 119.6(5)

C(13)-C(14)-C(15) 118.9(5)

C(13)-C(14)-C(10) 121.2(5)

C(15)-C(14)-C(10) 119.8(6)

C(16)-C(15)-C(14) 118.5(5)

N(1)-C(16)-C(15) 123.2(5)

C(22)-N(2)-C(26) 117.3(5)

C(22)-N(2)-Cu(1) 120.3(4)

C(26)-N(2)-Cu(1) 122.4(4)

O(4)-C(20)-O(3) 127.4(5)

O(4)-C(20)-C(24) 118.3(4)

O(3)-C(20)-C(24) 114.3(4)

C(20)-O(3)-Cu(1)#5 125.4(3)

C(20)-O(4)-Cu(1)#6 137.2(3)

N(2)-C(22)-C(23) 122.9(5)

C(22)-C(23)-C(24) 120.1(5)

C(23)-C(24)-C(25) 117.2(4)

C(23)-C(24)-C(20) 122.1(4)

C(25)-C(24)-C(20) 120.7(4)

C(26)-C(25)-C(24) 120.2(5)

N(2)-C(26)-C(25) 122.2(5)

_____________________________________________________________

Symmetry transformations used to generate equivalent atoms:

#1 x+1,-y,z+1/2 #2 x-1/2,-y+1/2,z-1/2

#3 x,-y,z+1/2 #4 x+1/2,-y+1/2,z+1/2 #5 x-1,-y,z-1/2

#6 x,-y,z-1/2

Table 4. Anisotropic displacement parameters (A^2 x 10^3) for [Cu(INA)2]2H2O.

_______________________________________________________________________

U11 U22 U33 U23 U13 U12

_______________________________________________________________________

Cu(1) 13(1) 8(1) 12(1) -1(1) -2(1) 0(1)

N(1) 13(3) 9(3) 11(3) -2(2) -4(2) 0(2)

C(10) 14(3) 10(3) 16(3) 5(2) -5(3) -1(2)

O(1) 21(3) 11(2) 12(2) 1(2) 1(2) -1(2)

O(2) 24(2) 23(2) 25(2) -10(2) 8(2) -11(2)

C(12) 18(3) 16(3) 13(3) -1(2) 3(3) -1(2)

C(13) 14(3) 17(3) 22(3) 0(3) 4(3) -1(2)

C(14) 13(3) 14(3) 14(3) -3(2) -7(3) 3(2)

C(15) 22(3) 13(2) 12(2) -1(2) 4(2) 0(2)

C(16) 17(3) 13(2) 13(2) -1(2) 3(2) 0(2)

N(2) 15(3) 13(2) 11(2) -1(2) 1(2) -3(2)

C(20) 18(3) 11(2) 10(2) -1(2) 0(2) 2(2)

O(3) 13(2) 10(2) 18(2) -1(2) -5(2) -1(2)

O(4) 16(2) 11(2) 16(2) -5(1) 4(2) 1(1)

C(22) 16(3) 17(2) 20(3) -1(2) -5(2) 8(2)

C(23) 16(3) 14(2) 17(3) -2(2) -10(2) 0(2)

C(24) 15(3) 10(2) 11(2) -1(2) -2(2) 1(2)

C(25) 16(3) 13(2) 23(3) -4(2) -1(2) 4(2)

C(26) 18(3) 14(2) 16(3) 0(2) -5(2) 3(2)

O(1W) 48(3) 59(3) 42(3) -12(2) 0(2) 18(2)

O(2W) 42(3) 91(5) 69(4) 5(4) 9(3) 15(3)

_______________________________________________________________________

Table 5. Hydrogen coordinates ( x 10^4) and isotropic

displacement parameters (A^2 x 10^3) for [Cu(INA)2]2H2O.

________________________________________________________________

x y z U(eq)

________________________________________________________________

H(12A) 4200(14) 1676(3) 6799(6) 19

H(13A) 5594(13) 2448(3) 7860(7) 21

H(15A) 10826(11) 2723(2) 5428(4) 18

H(16A) 9252(10) 1957(2) 4405(4) 17

H(22A) 310(11) 977(2) 2504(5) 22

H(23A) -1676(11) 339(2) 1179(5) 20

H(25A) 4490(10) -648(2) 2368(5) 21

H(26A) 6222(11) -6(2) 3754(5) 20

H(1W) -5008(10) 1311(2) -756(5) 75

H(2W) -3590(10) 1340(2) 412(5) 75

H(3W) -412(11) 1359(3) -994(6) 100

H(4WA) 840(11) 1760(3) -1518(6) 100

H(4WB) 676(11) 1267(3) -2038(6) 100

________________________________________________________________

Table 1. Crystal data and structure refinement for [Cu(INA)2(H2O)4].

Identification code candy5

Empirical formula C12 H16 Cu N2 O8

Formula weight 379.80

Temperature 293(2) K

Wavelength 0.71073 A

Crystal system Tricinic

Space group P-1

Unit cell dimensions a = 6.357(2) A alpha = 99.42(2) deg.

b = 6.926(2) A beta = 105.36(2) deg.

c = 9.213(3) A gamma = 108.14(2) deg.

Volume, Z 358.0(2) A^3, 1

Density (calculated) 1.761 Mg/m^3

Absorption coefficient 1.572 mm^-1

F(000) 195

Crystal size 0.4 x 0.2 x 0.05 mm

Theta range for data collection 2.38 to 24.99 deg.

Limiting indices 0<=h<=7, -7<=k<=7, -10<=l<=10

Reflections collected 1374

Independent reflections 1249 [R(int) = 0.0642]

Refinement method Full-matrix least-squares on F^2

Data / restraints / parameters 1237 / 0 / 106

Goodness-of-fit on F^2 1.093

Final R indices [I>2sigma(I)] R1 = 0.0625, wR2 = 0.1465

R indices (all data) R1 = 0.0976, wR2 = 0.2113

Largest diff. peak and hole 0.473 and -0.501 e.A^-3

Table 2. Atomic coordinates ( x 10^4) and equivalent isotropic

displacement parameters (A^2 x 10^3) for [Cu(INA)2(H2O)4].

U(eq) is defined as one third of the trace of the orthogonalized Uij tensor.

________________________________________________________________

x y z U(eq)

________________________________________________________________

Cu(1) 5000 5000 5000 29(1)

N(1) 2675(9) 3752(8) 2821(6) 26(1)

C(2) 333(12) 2983(11) 2516(8) 32(2)

C(3) -1264(12) 2251(11) 1019(7) 30(2)

C(4) -483(11) 2283(10) -249(7) 26(1)

C(5) 1948(12) 3016(10) 69(7) 29(2)

C(6) 3443(12) 3724(11) 1590(7) 30(2)

C(10) -2130(12) 1592(11) -1914(8) 31(2)

O(11) -4288(9) 601(9) -2139(6) 43(1)

O(12) -1282(9) 2013(9) -2941(5) 42(1)

O(1W) 3466(7) 7049(7) 5408(5) 31(1)

O(2W) 2516(9) 2314(8) 5927(6) 46(1)

________________________________________________________________

Table 3. Bond lengths [A] and angles [deg] for [Cu(INA)2(H2O)4].

_____________________________________________________________

Cu(1)-O(1W)#1 1.997(5)

Cu(1)-O(1W) 1.997(5)

Cu(1)-O(2W) 2.468(6)

Cu(1)-O(2W)#1 2.468(6)

Cu(1)-N(1)#1 2.006(5)

Cu(1)-N(1) 2.006(5)

N(1)-C(2) 1.347(8)

N(1)-C(6) 1.349(8)

C(2)-C(3) 1.378(9)

C(3)-C(4) 1.385(9)

C(4)-C(5) 1.398(10)

C(4)-C(10) 1.508(8)

C(5)-C(6) 1.373(9)

C(10)-O(12) 1.239(9)

C(10)-O(11) 1.270(9)

O(1W)#1-Cu(1)-O(1W) 179.998(2)

O(1W)#1-Cu(1)-N(1)#1 90.0(2)

O(1W)-Cu(1)-N(1)#1 90.0(2)

O(1W)#1-Cu(1)-N(1) 90.0(2)

O(1W)-Cu(1)-N(1) 90.0(2)

N(1)#1-Cu(1)-N(1) 180.0

C(2)-N(1)-C(6) 117.4(5)

C(2)-N(1)-Cu(1) 122.8(4)

C(6)-N(1)-Cu(1) 119.8(4)

N(1)-C(2)-C(3) 122.7(6)

C(2)-C(3)-C(4) 120.1(6)

C(3)-C(4)-C(5) 117.1(6)

C(3)-C(4)-C(10) 122.9(6)

C(5)-C(4)-C(10) 120.0(6)

C(6)-C(5)-C(4) 119.8(6)

N(1)-C(6)-C(5) 122.8(6)

O(12)-C(10)-O(11) 125.5(6)

O(12)-C(10)-C(4) 118.1(6)

O(11)-C(10)-C(4) 116.4(6)

_____________________________________________________________

Symmetry transformations used to generate equivalent atoms:

#1 -x+1,-y+1,-z+1

Table 4. Anisotropic displacement parameters (A^2 x 10^3) for

[Cu(INA)2(H2O)4].

The anisotropic displacement factor exponent takes the form:

-2 pi^2 [ h^2 a*^2 U11 + ... + 2 h k a* b* U12 ]

_______________________________________________________________________

U11 U22 U33 U23 U13 U12

_______________________________________________________________________

Cu(1) 26(1) 38(1) 17(1) 0(1) -2(1) 14(1)

N(1) 29(3) 30(3) 17(3) 1(2) 5(2) 12(2)

C(2) 26(4) 41(4) 23(3) -1(3) 6(3) 12(3)

C(3) 24(3) 38(4) 23(3) 3(3) 3(3) 11(3)

C(4) 28(4) 21(3) 21(3) 3(3) 0(3) 8(3)

C(5) 33(4) 31(4) 20(3) 9(3) 7(3) 9(3)

C(6) 26(4) 34(4) 24(3) 6(3) 1(3) 13(3)

C(10) 31(4) 28(4) 25(3) 0(3) -4(3) 11(3)

O(11) 31(3) 50(3) 32(3) 7(2) -6(2) 10(3)

O(12) 35(3) 65(4) 23(3) 10(2) 3(2) 23(3)

O(1W) 25(2) 46(3) 19(2) 5(2) -3(2) 18(2)

O(2W) 37(3) 54(4) 47(3) 16(3) 9(3) 21(3)

_______________________________________________________________________

Table 5. Hydrogen coordinates ( x 10^4) and isotropic

displacement parameters (A^2 x 10^3) for [Cu(INA)2(H2O)4].

________________________________________________________________

x y z U(eq)

________________________________________________________________

H(2A) -229(12) 2945(11) 3350(8) 38

H(3A) -2867(12) 1735(11) 859(7) 36

H(5A) 2551(12) 3023(10) -747(7) 35

H(6A) 5055(12) 4206(11) 1778(7) 36

H(1W) 3189(7) 7562(7) 4632(5) 38

H(2W) 4385(7) 8056(7) 6210(5) 38

H(3W) 2003(9) 2866(8) 6581(6) 55

H(4W) 3263(9) 1604(8) 6339(6) 55

________________________________________________________________
