# Supplementary figures and images for: Physical stability vs. chemical lability in microporous metal coordination polymers: a comparison of [Cu(OH)(INA)]n and [Cu(INA)2]n: INA = 1,4-(NC5H4CO2)Electronic supplementary information (ESI) available: 1. Structure determination summaries for compounds 1–3. 2. Powder X-ray diffraction patterns: (a) for 1 and (b) for 2 after prolonged heating at different temperatures, establishing framework stabilities and (c) showing transformation of polymer 2 to the molecular compound 3, after 12 h in H2O. Fig. S1: copper coordination environments in compounds 1–3. See http://www.rsc.org/suppdata/cc/b2/b201501n/
Source: Royal Society of Chemistry journal article supplement (doi:10.1039/b201501n), 2002-07-02

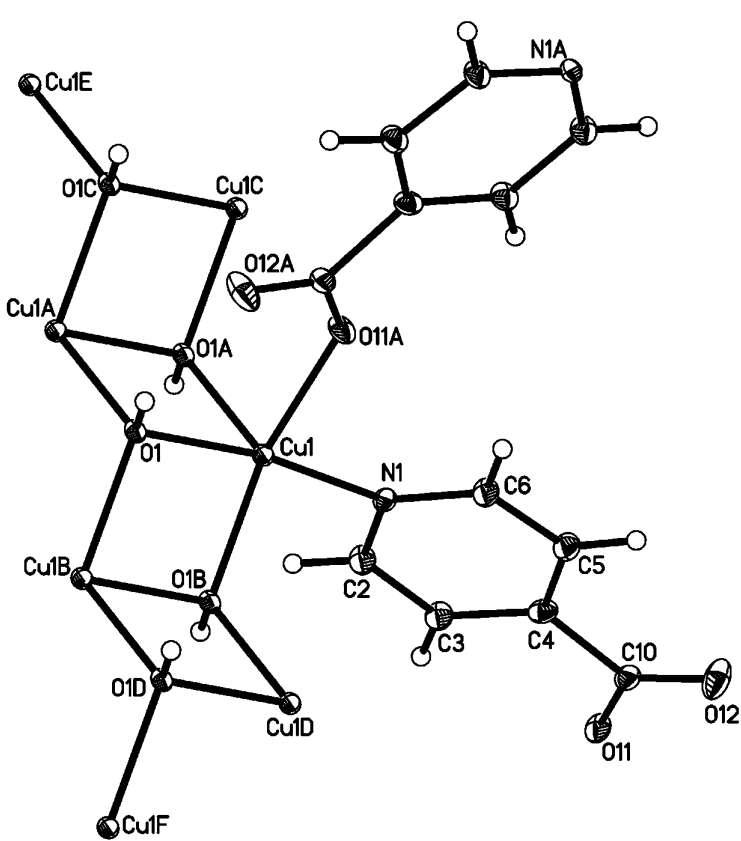

1

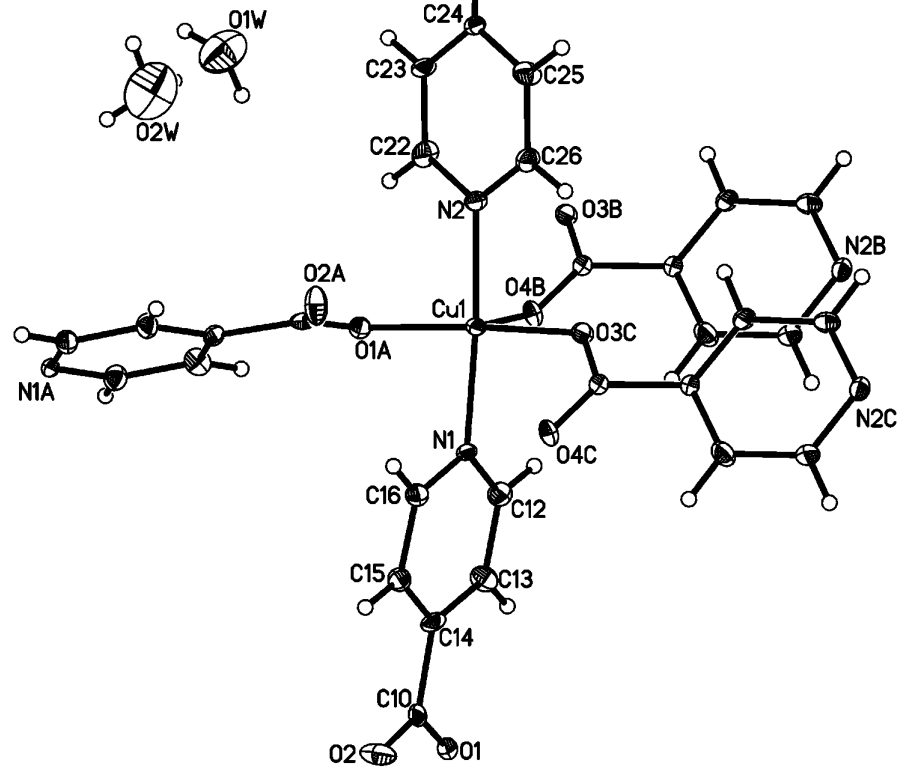

2

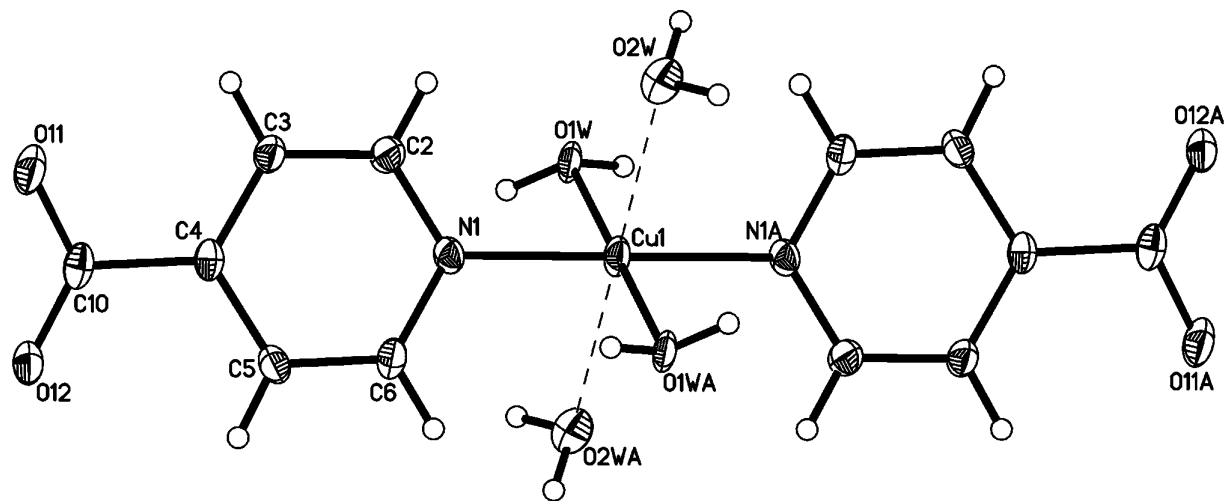

3

Supplement: b201501n2.pdf [file b201501n2.pdf]
